# Supplementary material for: Cultivar-dependent phenotypic and chemotypic responses of drug-type Cannabis sativa L. to polyploidization
Source: Front Plant Sci. 2023 Aug 11;14:1233191. doi: 10.3389/fpls.2023.1233191 (PMC10455935; doi:10.3389/fpls.2023.1233191)
Supplement: Supplementary file 2 [file Table_2.xlsx]

## Sheet: Foglio1
		Changes in volatile concentration compared to diploid expressed as a percentage
		triploid	triploid	triploid	triploid		tetraploid	tetraploid	tetraploid	tetraploid			= Increase in concentration compared to diploid
		A	B	C	D		A	B	C	D			= decrease in concentration compared to diploid
	compound											NA	= compound not detected in that cultivar
1	Fenchone	-35.8455	-42.3081	-20.7531	-81.5222		-65.2126	-44.5577	5.45114	-91.7274			compound not present in diploid
2	Linalool	36.4054	211.127	37.0624	-20.866		-41.9037	92.89	51.4547	-43.3003			compound present in diploid but not in tri- or tetraploid
3	L-α-Terpineol	-15.865	-18.1888	-40.3084	-13.0797		-49.846	150.865	-19.6878	-65.8688		Bold	Significant compared to diploid with a Dunn test p<0.05
4	β-Germacrene	279.534	17.7274	35.2308	-31.7899		-37.2118	96.0682	61.8416	-46.0628
5	Fenchol	-33.6429	-38.3369	-42.7241	-66.6552		-61.2848	59.3918	-25.0231	-66.3072
6	Butanoic acid, hexyl ester	45.3714	NA	NA			-13.5386	NA	NA	393.265
7	Selina-3,7(11)-diene	25.6703	-22.9913	-22.5201	-72.4454		-60.6502	37.4194	7.00295	-68.5149
8	cis-2-Norbornanol	-58.7517	-66.6504	-47.1629	-66.8943		-45.4051	-7.65078	-31.736	-71.087
9	3-Eudesmen-11-ol	-8.11576	-20.8515	-69.7329	-56.9033		67.1903		-15.186	-65.6012
10	γ-Selinene	22.5287	-7.15356	-19.011	-68.9043		-68.6031	19.3791	10.8341	-86.1741
11	β-Maaliene	14.3874	8.10026	-26.2295	-49.4127		-57.6696	164.83	52.9258	-73.7079
12	Caryophyllene	-0.21644	8.67235	4.32585	-66.0469		-46.8663	130.18	100.91	-80.4307
13	Bicyclogermacrene	131.33	-33.0201	-26.925	-27.648		-26.1091	274.77	28.0295	15.2073
14	1,4,7,-Cycloundecatriene, 1,5,9,9-tetramethyl-, Z,Z,Z-		-61.7977	-29.0148	-26.9661		-16.7097	70.6998	64.5819	-80.9358
15	Guaiol	14.297	-45.3644	2.37132	-59.0164		151.39		-14.2885	-63.6737
16	Ylangene	-23.9423	-12.0492	0.522416	50.1397		-72.7525	148.469	182.135	-37.3019
17	β-Selinene	-0.751161	-25.0224	-33.8419	-94.5369		-56.6562	113.955	3.7112	59.1672
18	Camphenilanol	-66.1452	-68.5097	-45.8461	-49.0156		-63.9161	26.7104	-25.3849	-80.9336
19	β-bisabolene		NA	NA	-88.2957			NA	NA	-94.4254
20	D-Limonene	-28.281	-39.7756	-46.5164	-83.5816		-67.436	17.8493	-19.9674	-79.1266
21	Selina-5,11-diene	-78.6048	-37.9081	-58.1533	-95.7146			-5.51458	21.1106
22	γ-Eudesmol	-24.1924	-47.6142	29.2146	-54.5778		105.391	-82.129	-29.8254	-69.0566
23	Eudesm-7(11)-en-4-ol			-59.8207			-59.2357	111.23	112.927
24	cis-α-Bergamotene	-9.66647	5.90706	78.1091	29.9741		78.0415		83.0855	-11.6249
25	Guaia-6,9-diene		529.428	-10.7737				3378.74	145.445
26	α-Costol				NA				129.409	NA
27	α-Amorphene						-0.824796	46.1778
28	cis-Caryophyllene	NA	NA	-53.1932			NA	NA	193.639
29	Citral	NA	NA	NA			NA	NA	NA
30	Guai-1(10)-en-11-ol	-32.4049	-21.3521	6.02112	-47.186		159.959		-56.4472	-79.4094
31	β-Cymene	NA	NA	NA			NA	NA	NA
32	γ-Muurolene	-49.2729	1189.63	265.037			97.2815		331.859	-80.5616
33	γ-Cadinene		-65.1973	132.007			-64.5703	474.119	179.522	0
